# Supplementary material for: Insight on pollution and energy recovery potential of leachate from landfill sites of Northern India
Source: Research Square preprint supplement (doi:10.21203/rs.3.rs-3330046/v1), 2023-09-28
Supplement: Supplementary file 1 [file 88a7ca8ca5bbd51bdedab8dd.docx]

**Table 2. Results of the PCA for leachates from the Ghazipur landfill**

| Number of Principal  Component | Eigen  value | % of Variance | Cumulative % of Total  Variance |
| --- | --- | --- | --- |
| 1 | 9.79287 | 54.40% | 54.40% |
| 2 | 4.78923 | 26.61% | 81.01% |
| 3 | 2.06866 | 11.49% | 92.50% |
| 4 | 1.34924 | 7.50% | 100.00% |

| Variable | Component 1 | Component 2 | Component 3 | Component 4 |
| --- | --- | --- | --- | --- |
|  |  |  |  |  |
| pH | -0.29192 | 0.12774 | 0.12183 | -0.20483 |
| **EC** | **0.61307** | 0.02935 | -0.12535 | 0.0512 |
| **TDS** | **0.61307** | 0.02935 | -0.12535 | 0.0512 |
| **BOD** | **0.60511** | -0.11767 | -0.05398 | -0.10904 |
| **COD** | **0.61577** | 0.03816 | -0.08799 | 0.02021 |
| K | -0.21315 | 0.05696 | 0.00413 | **0.73233** |
| Cl | 0.2359 | -0.23435 | -0.03496 | **0.57474** |
| **NO3** | **0.59154** | 0.12658 | 0.10172 | -0.227 |
| **TKN** | **0.47299** | -0.22326 | -0.11883 | 0.04103 |
| **NH3-N** | **0.48344** | -0.1792 | -0.16725 | 0.03425 |
| HCO3 | 0.0653 | 0.1666 | **0.73026** | 0.05153 |
| Cd | 0.06888 | **0.54408** | -0.06185 | -0.02905 |
| Cr | 0.01604 | **0.51517** | -0.0987 | **0.43545** |
| Cu | 0.1765 | **0.44144** | 0.10648 | -0.28955 |
| Fe | 0.24257 | 0.02107 | 0.44499 | 0.09436 |
| Ni | 0.15356 | **0.45631** | 0.01835 | 0.34474 |
| Zn | 0.15221 | **0.46255** | -0.24578 | -0.11755 |
| Mn | 0.19748 | -0.19431 | **0.55662** | 0.06641 |

**Table 3. Results of the PCA for leachates from Okhla landfill**

| Number of Principal  Component | Eigenvalue | % of Variance | Cumulative % of Total  Variance |
| --- | --- | --- | --- |
| 1 | 9.90353 | 55.02% | 55.02% |
| 2 | 5.53356 | 30.74% | 85.76% |
| 3 | 2.5629 | 14.24% | 100.00% |

| Variable | Component 1 | Component 2 | Component 3 |
| --- | --- | --- | --- |
| pH | -0.29191 | -0.1675 | 0.01806 |
| EC | 0.28382 | 0.01722 | -0.27977 |
| TDS | 0.28382 | 0.01722 | -0.27977 |
| BOD | 0.24938 | 0.25061 | -0.11942 |
| COD | 0.24547 | 0.26741 | 0.05423 |
| K | 0.0256 | -0.06247 | **0.71581** |
| Cl | -0.00412 | **0.58665** | 0.25949 |
| NO3 | 0.19931 | **0.52238** | 0.11083 |
| TKN | 0.11033 | **0.58357** | -0.15966 |
| NH3-N | 0.19451 | **0.53607** | -0.01102 |
| **HCO3** | **0.51504** | -0.05117 | 0.03166 |
| Cd | 0.29255 | -0.16439 | 0.03357 |
| Cr | 0.26305 | -0.23279 | 0.07615 |
| Cu | 0.26608 | -0.22686 | 0.07404 |
| Fe | 0.07857 | 0.16056 | **0.65738** |
| Ni | 0.26352 | -0.2308 | 0.08259 |
| Zn | 0.26702 | -0.22574 | 0.06819 |
| Mn | 0.26284 | -0.23309 | 0.07697 |

**Table 4. Results of the PCA for leachates from Bhalswa landfill**

| Number of Principal  Component | Eigenvalue | % of Variance | Cumulative % of Total  Variance |
| --- | --- | --- | --- |
| 1 | 9.41388 | 52.30% | 52.30% |
| 2 | 4.42427 | 24.58% | 76.88% |
| 3 | 2.94166 | 16.34% | 93.22% |
| 4 | 1.22019 | 6.78% | 100.00% |

| Variable | Component 1 | Component 2 | Component 3 | Component 4 |
| --- | --- | --- | --- | --- |
| pH | **-0.52058** | 0.07878 | 0.01 | -0.06252 |
| EC | **-0.50011** | 0.081 | -0.13747 | 0.2352 |
| TDS | **-0.50011** | 0.081 | -0.13747 | 0.2352 |
| BOD | **0.52304** | -0.02377 | 0.06881 | 0.03131 |
| COD | **0.52332** | 0.00601 | 0.05766 | 0.06991 |
| K | -0.00031 | **0.59019** | -0.29526 | -0.23942 |
| Cl | -0.04867 | **0.65372** | 0.14828 | 0.0428 |
| NO3 | **0.52172** | 0.01084 | 0.05743 | 0.11226 |
| TKN | **0.51063** | 0.01841 | 0.08017 | 0.24166 |
| NH3-N | 0.2941 | -0.03181 | -0.09355 | 0.357 |
| HCO3 | -0.07262 | 0.2732 | **0.65398** | -0.10654 |
| Cd | **0.52132** | 0.00418 | 0.07426 | -0.09803 |
| Cr | -0.16736 | -0.09738 | **0.6828** | 0.08437 |
| Cu | -0.11131 | 0.24929 | -0.05382 | **0.70117** |
| Fe | 0.09656 | **0.62292** | 0.10054 | -0.27335 |
| Ni | -0.08726 | 0.10306 | **0.74439** | 0.08838 |
| Zn | 0.22354 | **0.53821** | 0.03831 | 0.1254 |
| Mn | 0.05926 | **0.61272** | -0.26619 | -0.06333 |
